# Supplementary material for: Dimeric magnetic dumbbell nanoparticles with selective immobilization of chromophores for improved tumor theranostics
Source: Sci Rep. 2026 Mar 5;16:12101. doi: 10.1038/s41598-026-40586-4 (PMC13076682; doi:10.1038/s41598-026-40586-4)
Supplement: Supplementary file 1 — Supplementary Material 1 [file 41598_2026_40586_MOESM1_ESM.docx]

**Additional Information:**

Selective immobilization of fluorescent dye and photosensitizers on dumbbell like magnetite-gold nanoparticles for improved tumor theranostics.

*Iuliia Chudosai 1, Petr Ostroverkhov 4, Ekaterina Plotnikova 4,5, Kseniya Stepanova 3, Nelli Chmelyuk 2,3, Elizaveta Ivanova 2,3, Mihail A. Grin 4, Olga Fedorova 6, Natalia Klyachko 1, Vladimir P. Chekhonin 2,3, Maxim Abakumov 2,3,*.*

*1* Department of Chemistry, Lomonosov Moscow State University, Moscow 119991, Russia

*2* Pirogov Russian National Research Medical University, Ostrovitianov Str. 1, 117997 Moscow, Russia

*3* National Research Technological University “MISIS”, Biomedical Nanomaterials, Leninskiy prospekt 4, 119049 Moscow, Russia

*4* Russian Technological University (MIREA), 86 Vernadsky Avenue, 119571 Moscow, Russia

*5* National Medical Research Radiological Centre of the Ministry of Health of the Russian Federation, P.A. Hertsen Moscow Oncology Research Institute, 125284 Moscow, Russia

*6* A. N. Nesmeyanov Institute of Organoelement Compounds, Russian Academy of Sciences, 119334 Moscow, Russian Federation

*** [abakumov1988@gmail.com](mailto:abakumov1988@gmail.com)


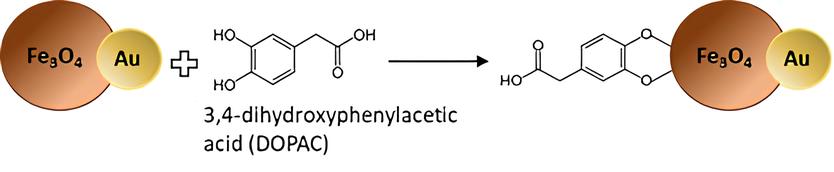


1. Scheme of DOPAC coating with Fe3O4-Au NPs (NP/DOPAC)


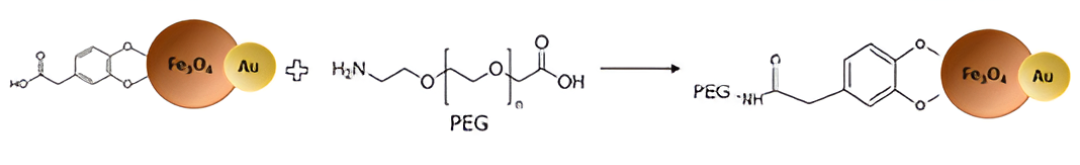


1. Scheme of PEG coating of NP/DOPAC (NP/DOPAC/PEG)


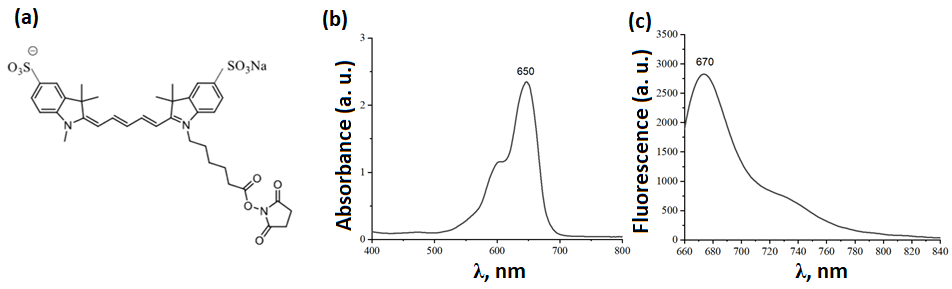


1. (a) structure of FP; (b) absorbtion spectra of FP; (c) fluorescence spectra of FP (excitation wavelength = 650 nm)


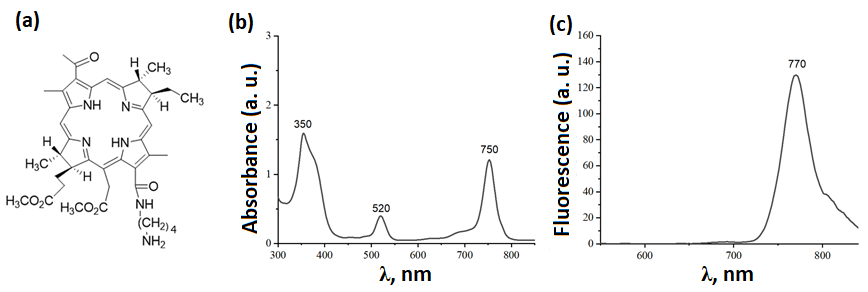


1. (a) structure of PS; (b) absorbtion spectra of PS; (c) fluorescence spectra of PS (excitation wavelength = 520 nm)


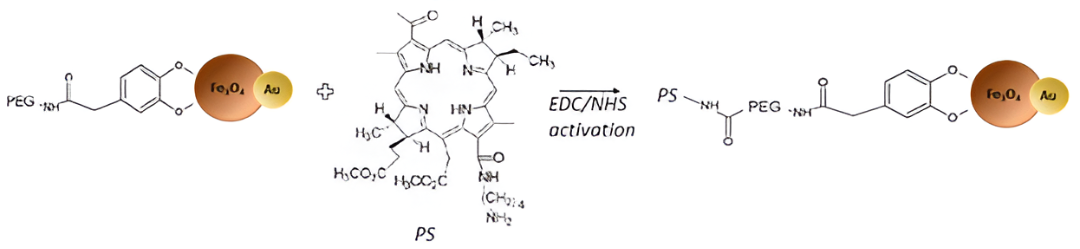


1. Scheme of covalent conjugation of NP/DOPAC/PEG with PS (NP/PS)


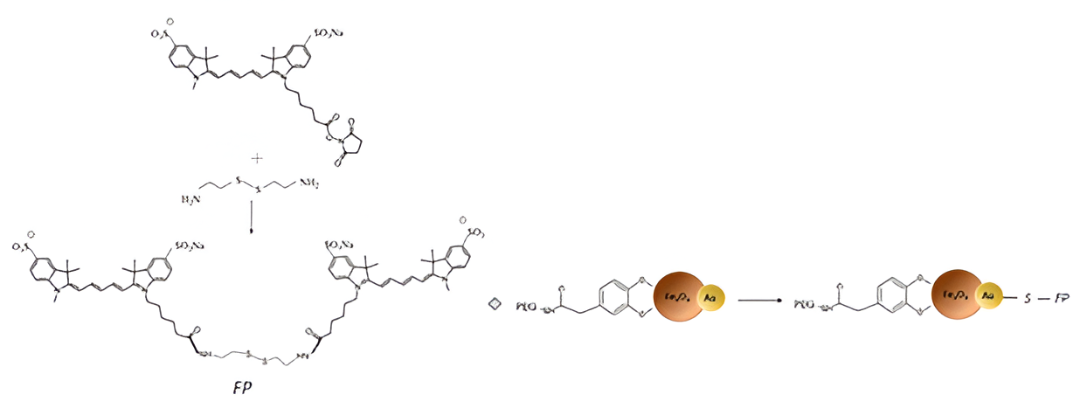


1. Scheme of covalent conjugation of NP/DOPAC/PEG with FP (NP/FP)


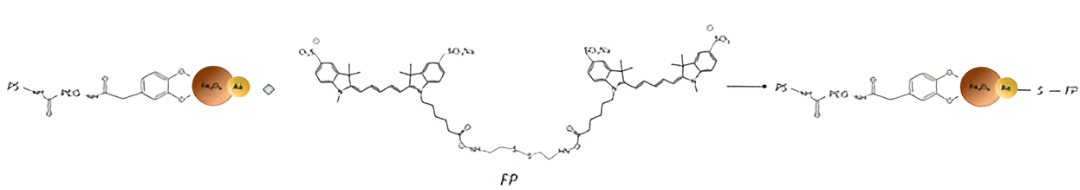


1. NP/PS/FP synthesis scheme


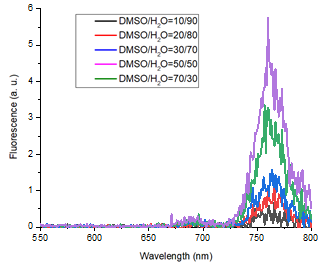


1. Fluorescence spectra of PS in solutions with different DMSO/H2O (excitation wavelength 530 nm)
